# Supplementary material for: Electricity production and the analysis of the anode microbial community in a constructed wetland-microbial fuel cell
Source: Royal Society of Chemistry journal article supplement (doi:10.1039/c8ra10130b), 2019-01-01

Supplementary Information

Table

Table S1. Composition of synthetic wastewaters during period 1.

| Component                                                       | complete<br>wastewater(mg/L) | lacking ammonium<br>wastewater(mg/L) | lacking<br>wastewater(mg/L) | nitrate |
|-----------------------------------------------------------------|------------------------------|--------------------------------------|-----------------------------|---------|
| C <sub>6</sub> H <sub>12</sub> O <sub>6</sub> ·H <sub>2</sub> O | 128.64±0.99                  | 128.64±0.99                          | 128.64±0.99                 |         |
| KH <sub>2</sub> PO <sub>4</sub>                                 | 8.23±0.79                    | 8.23±0.79                            | 8.23±0.79                   |         |
| Na <sub>2</sub> HPO <sub>4</sub> ·12H <sub>2</sub> O            | 19.08±1.10                   | 19.08±1.10                           | 19.08±1.10                  |         |
| MgCl <sub>2</sub> ·6H <sub>2</sub> O                            | 18.92±1.06                   | 18.92±1.06                           | 18.92±1.06                  |         |
| ZnCl <sub>2</sub>                                               | 8.11±0.62                    | 8.11±0.62                            | 8.11±0.62                   |         |
| CaCl <sub>2</sub>                                               | 18.79±0.72                   | 18.79±0.72                           | 18.79±0.72                  |         |
| CH <sub>3</sub> COONa                                           | 107.25±1.20                  | 107.25±1.20                          | 107.25±1.20                 |         |
| CuSO <sub>4</sub> ·5H <sub>2</sub> O                            | 10.70±0.57                   | 10.70±0.57                           | 10.70±0.57                  |         |
| NaNO <sub>3</sub>                                               | 29.50±0.99                   | 29.50±0.99                           | -                           |         |
| NH <sub>4</sub> Cl                                              | 31.60±0.22                   | -                                    | 31.60±0.22                  |         |

Table S2. Composition of synthetic wastewaters during period 2.

| Component                                                       | complete<br>wastewater(mg/L) | lacking ammonium<br>wastewater(mg/L) | lacking<br>wastewater(mg/L) | nitrate |
|-----------------------------------------------------------------|------------------------------|--------------------------------------|-----------------------------|---------|
| C <sub>6</sub> H <sub>12</sub> O <sub>6</sub> ·H <sub>2</sub> O | 257.18±0.92                  | 257.18±0.92                          | 257.18±0.92                 |         |
| KH <sub>2</sub> PO <sub>4</sub>                                 | 8.23±0.79                    | 8.23±0.79                            | 8.23±0.79                   |         |
| Na <sub>2</sub> HPO <sub>4</sub> ·12H <sub>2</sub> O            | 19.08±1.10                   | 19.08±1.10                           | 19.08±1.10                  |         |
| MgCl <sub>2</sub> ·6H <sub>2</sub> O                            | 18.92±1.06                   | 18.92±1.06                           | 18.92±1.06                  |         |
| ZnCl <sub>2</sub>                                               | 8.11±0.62                    | 8.11±0.62                            | 8.11±0.62                   |         |
| CaCl <sub>2</sub>                                               | 18.79±0.72                   | 18.79±0.72                           | 18.79±0.72                  |         |
| CH <sub>3</sub> COONa                                           | 214.32±0.80                  | 214.32±0.80                          | 214.32±0.80                 |         |
| CuSO <sub>4</sub> ·5H <sub>2</sub> O                            | 10.70±0.57                   | 10.70±0.57                           | 10.70±0.57                  |         |
| NaNO <sub>3</sub>                                               | 58.93±0.55                   | 58.93±0.55                           | -                           |         |
| NH <sub>4</sub> Cl                                              | 63.20±0.46                   | -                                    | 63.20±0.46                  |         |

**Table S3. Composition of synthetic wastewaters during period 3**

| Component                                                       | complete wastewater(mg/L) | lacking ammonium wastewater(mg/L) | lacking nitrate wastewater(mg/L) |
|-----------------------------------------------------------------|---------------------------|-----------------------------------|----------------------------------|
| C <sub>6</sub> H <sub>12</sub> O <sub>6</sub> ·H <sub>2</sub> O | 514.33±0.15               | 514.33±0.15                       | 514.33±0.15                      |
| KH <sub>2</sub> PO <sub>4</sub>                                 | 8.23±0.79                 | 8.23±0.79                         | 8.23±0.79                        |
| Na <sub>2</sub> HPO <sub>4</sub> ·12H <sub>2</sub> O            | 19.08±1.10                | 19.08±1.10                        | 19.08±1.10                       |
| MgCl <sub>2</sub> ·6H <sub>2</sub> O                            | 18.92±1.06                | 18.92±1.06                        | 18.92±1.06                       |
| ZnCl <sub>2</sub>                                               | 8.11±0.62                 | 8.11±0.62                         | 8.11±0.62                        |
| CaCl <sub>2</sub>                                               | 18.79±0.72                | 18.79±0.72                        | 18.79±0.72                       |
| CH <sub>3</sub> COONa                                           | 428.60±0.43               | 428.60±0.43                       | 428.60±0.43                      |
| CuSO <sub>4</sub> ·5H <sub>2</sub> O                            | 10.70±0.57                | 10.70±0.57                        | 10.70±0.57                       |
| NaNO <sub>3</sub>                                               | 117.83±0.47               | 117.83±0.47                       | -                                |
| NH <sub>4</sub> Cl                                              | 102.73±0.58               | -                                 | 102.73±0.58                      |

**Table S4. CE of three systems during three periods**

|          | System 1(%) | System 2(%) | System 3(%) |
|----------|-------------|-------------|-------------|
| Period 1 | 0.5-0.62    | 0.3-0.42    | 0.52-0.85   |
| Period 2 | 0.46-0.59   | 0.38-0.47   | 0.5-0.47    |
| Period 2 | 0.2-0.31    | 0.16-0.22   | 0.3-0.41    |

**Figure**

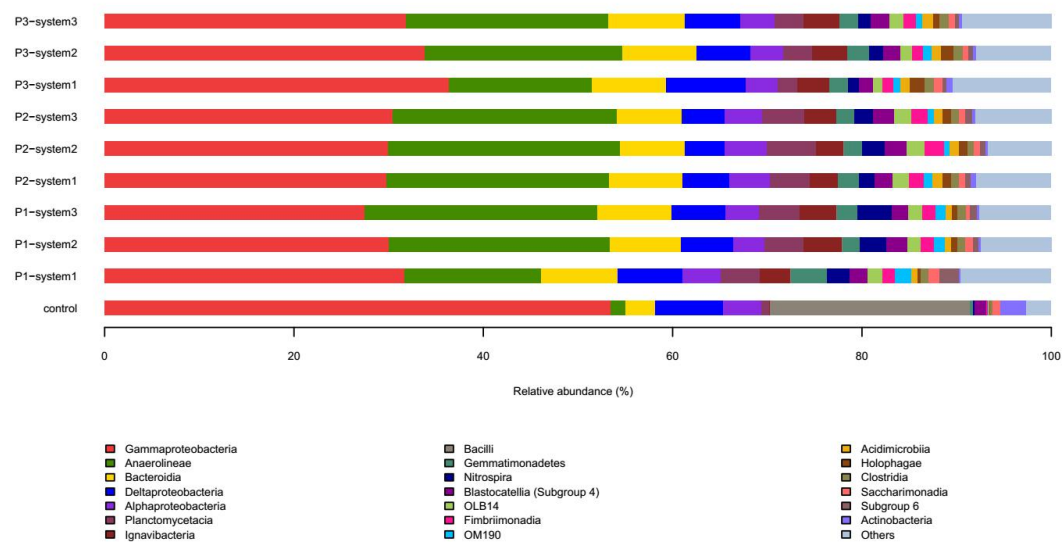

**Fig S1. Relative abundance of 16S rDNA sequences of the anode biofilms in CW-MFCs supplemented using different types of synthetic wastewater during three periods at class levels .**

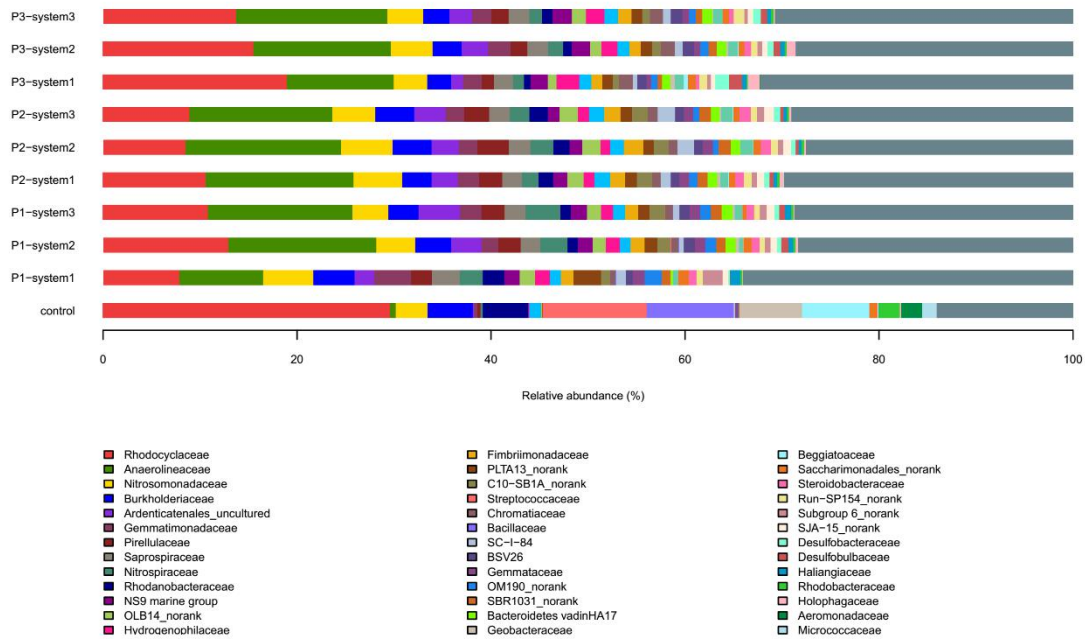

Fig S2. Relative abundance of 16S rDNA sequences of the anode biofilms in CW-MFCs supplemented using different types of synthetic wastewater during three periods at family levels .

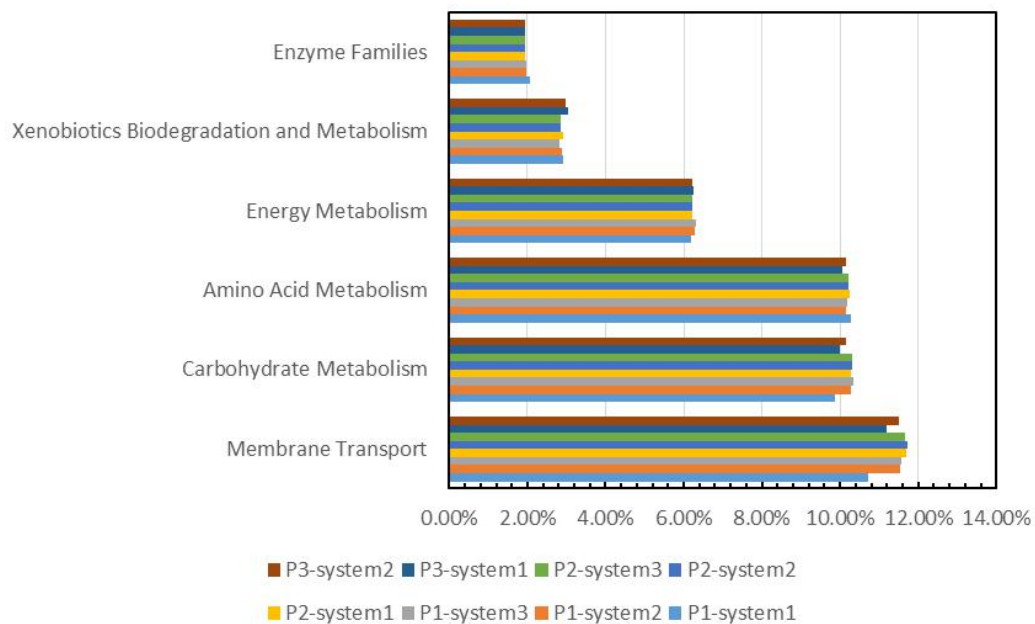

Fig S3. Prediction of the abundance of functional gene contents of the anode biofilms in

CW-MFCs supplemented using different types of synthetic wastewater during three periods.

A

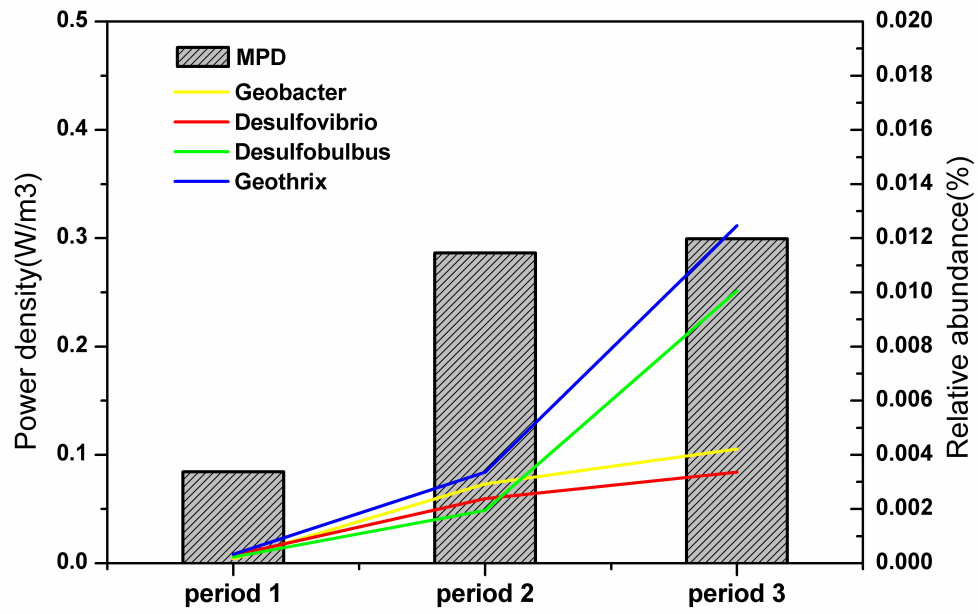

B

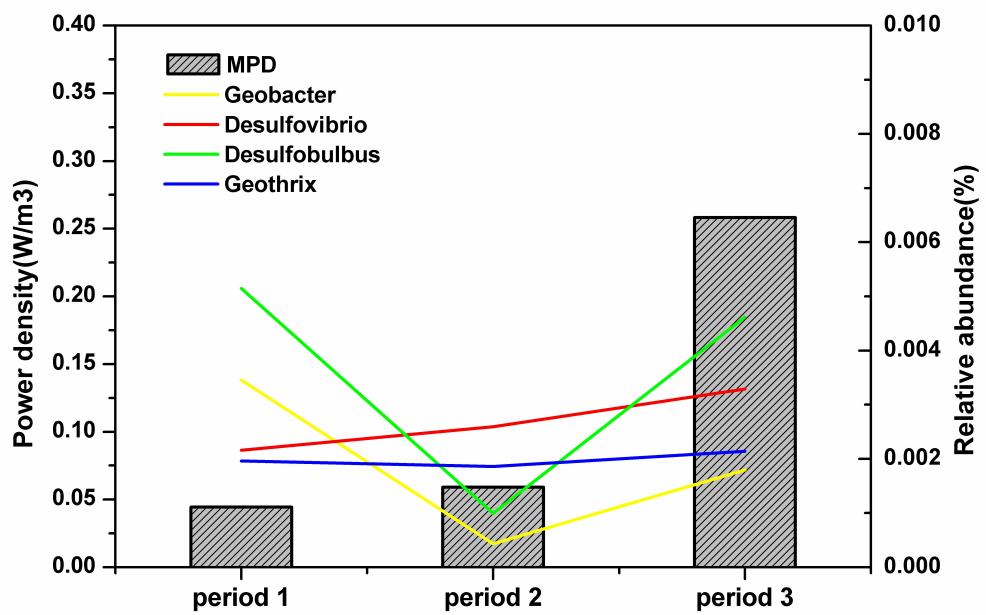

C

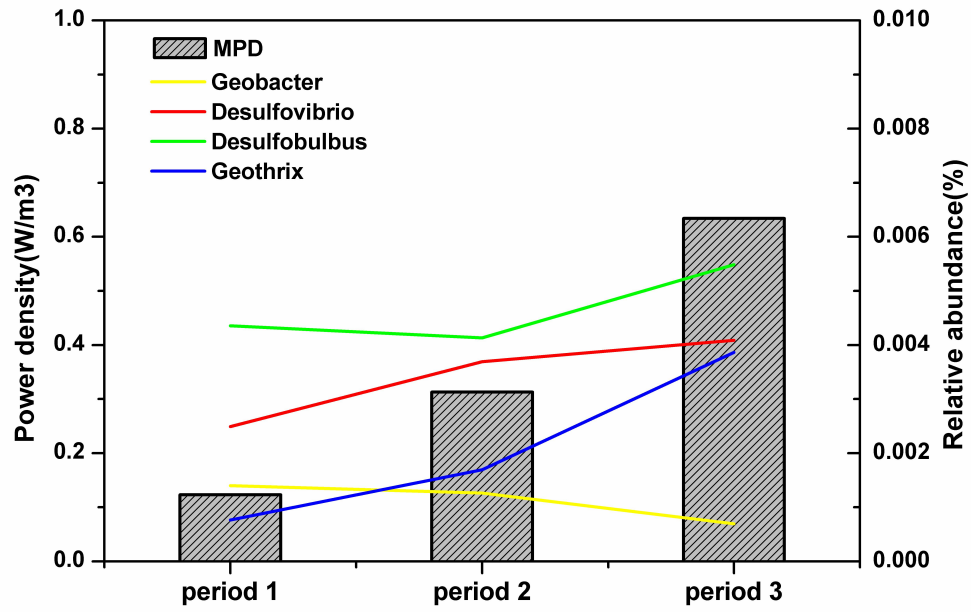

Fig S4 Correlation between maximum power density and the relative abundance of four important EAB. (A) (B) and (C) represent this correlation in system 1, system 2 and system 3 during three periods.

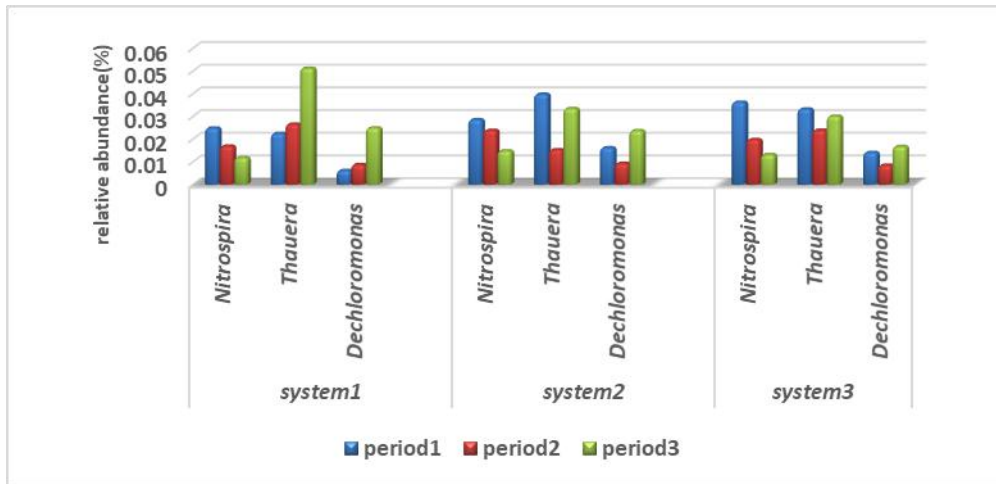

Fig S5 The relative abundance of three important denitrifying bacteria during three systems.

graphical abstract

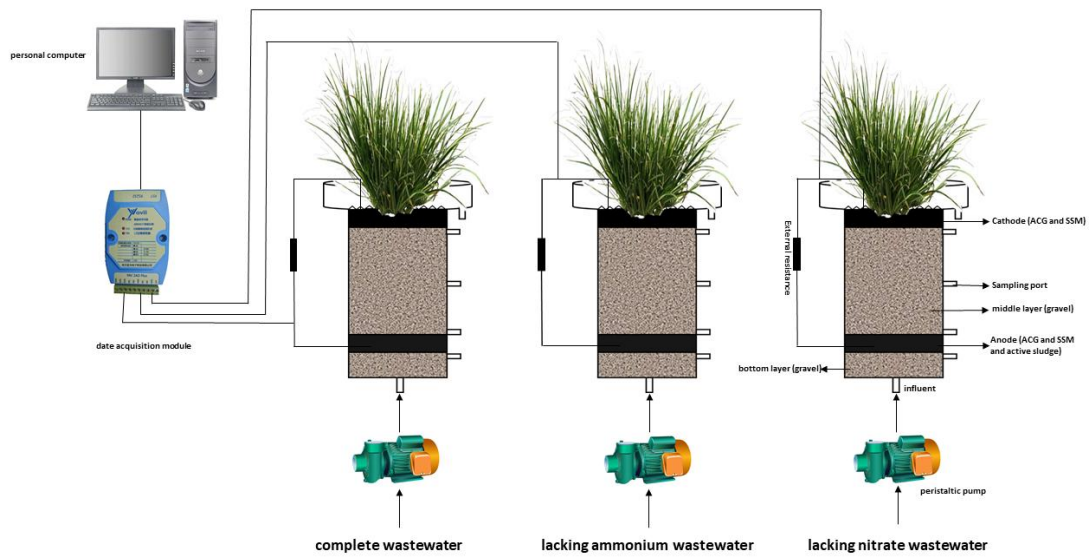

Supplement: c8ra10130b1.pdf [file c8ra10130b1.pdf]
